# Supplementary material for: The anti-tumor activity of pralatrexate (PDX) correlates with the expression of RFC and DHFR mRNA in preclinical models of multiple myeloma
Source: PubMed Central journal article supplement (PMC7210016; doi:10.18632/oncotarget.27516), 2020-05-05

## The anti-tumor activity of pralatrexate (PDX) correlates with the expression of RFC and DHFR mRNA in preclinical models of multiple myeloma

### SUPPLEMENTARY MATERIALS

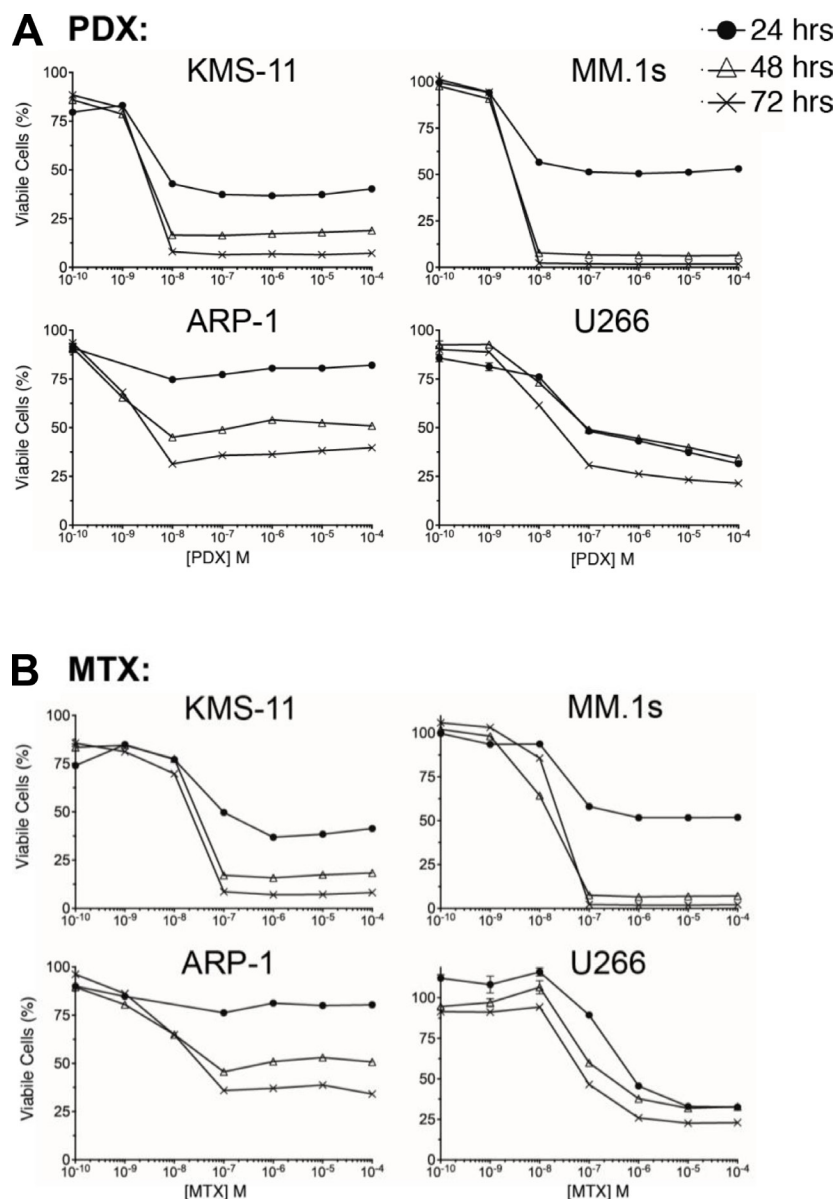

**Supplementary Figure 1: Cell-viability curves demonstrate time and concentration dependence after treatment with antifolates in HMCLs.** KMS-11, MM.1s, ARP-1 and U266 HMCLs were incubated with increasing concentrations of (A) pralatrexate (PDX) or (B) methotrexate (MTX) for 24, 48 and 72 hrs. Curves were generated using CellTiter Glo.

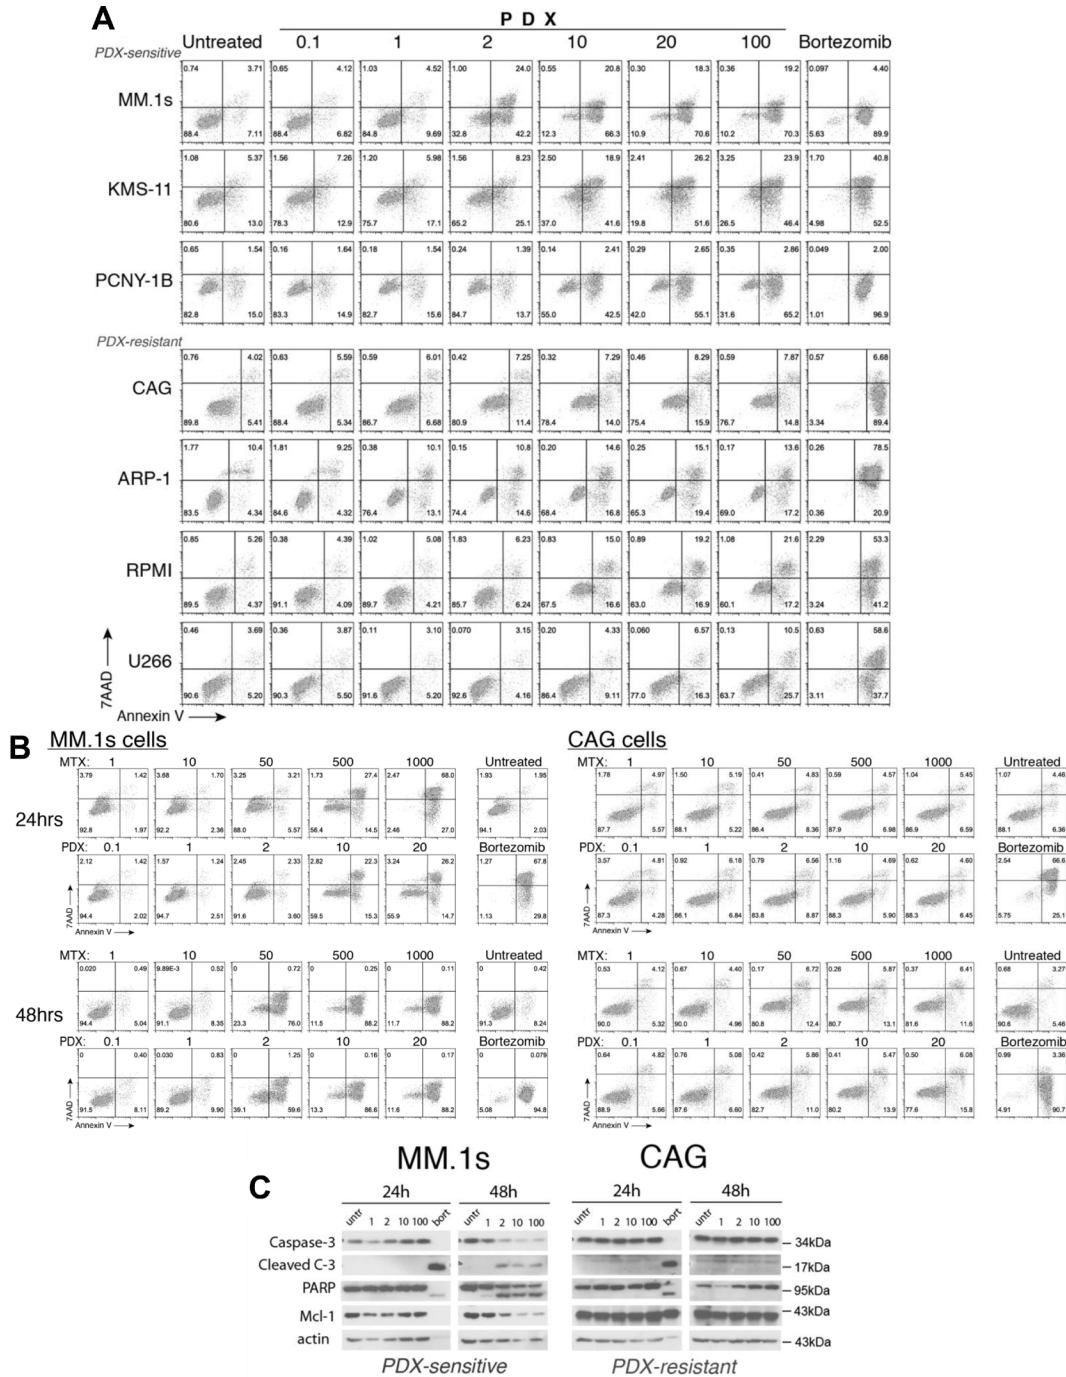

**Supplementary Figure 2: Apoptosis induction observed in a panel of PDX-sensitive and PDX-resistant HMCLs. (A)** A flow cytometry dot plot array shows 7AAD/ $\alpha$ BrdU co-stained MM.1s, KMS-11, PCNY-1B, CAG, ARP-1, RPMI and U266 cells that were incubated with increasing concentrations of PDX (0.1–100 nM). Time point was taken at 48 hours post treatment. Untreated cells (*untr*) served as a negative control and bortezomib (10–50 nM) treated cells served as a positive control for apoptotic cell death. **(B)** A flow cytometry dot plot array shows 7AAD/ $\alpha$ BrdU co-stained MM.1s and CAG cells at 24 and 48 hours post treatment with MTX (1–1000 nM) or PDX (0.1–20 nM). Untreated cells (*untr*) served as a negative control and bortezomib (10–50 nM) treated cells served as a positive control for apoptotic cell death. **(C)** PDX-sensitive cells, MM.1s, and PDX-resistant cells, CAG, were incubated with increasing concentrations of PDX (1, 2, 10, 100 nM) for 24 and 48 hrs. Whole cell lysates were run on a SDS-PAGE gel and protein expression analyzed by western blot.

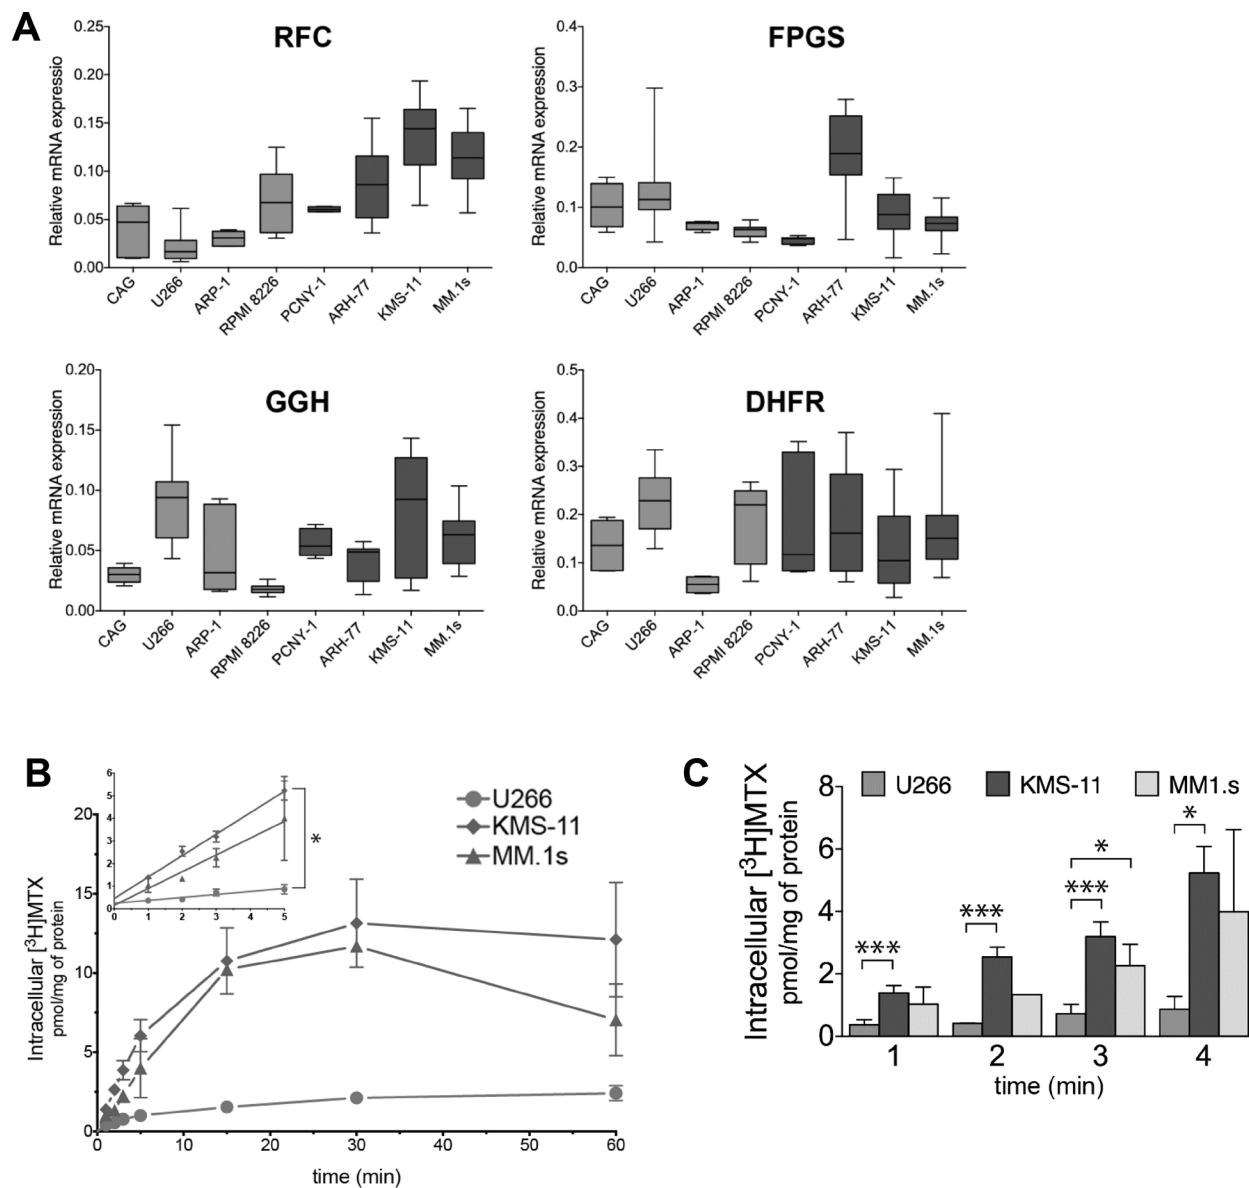

Supplement: oncotarget-11-1576-s001.pdf [file oncotarget-11-1576-s001.pdf]
